# Supplementary material for: Assessing Metabolic Markers in Glioblastoma Using Machine Learning: A Systematic Review
Source: MDPI journal article supplement (doi:10.3390/metabo13020161), 2023-01-21
Supplement: s1 [file s1]

## **Supplementary Materials**

### **Supplementary Materials S1: Search String**

#### **PubMed**

((((Metabolism[MeSH Terms]) OR (biomarkers[MeSH Terms]))) AND ((Glioblastoma[Title/Abstract]) OR (glioblastoma[MeSH Terms]))) AND (((((artificial intelligence[MeSH Terms]) OR ("Artificial Intelligence"[Title/Abstract])) OR ("Machine Learning"[Title/Abstract])) OR ("Deep Learning"[Title/Abstract])) OR ("Predictive model"[Title/Abstract]))

#### **Embase**

('metabolism':ti,ab OR 'biological marker':ti,ab) AND 'glioblastoma' AND ('artificial intelligence':ti,ab OR 'machine learning':ti,ab OR 'deep learning':ti,ab OR 'predictive model':ti,ab)

#### **Web of Science**

((("metabolism" OR "biomarkers") AND "glioblastoma" AND ("artificial intelligence" OR "machine learning" OR "deep learning" OR "predictive model"))).ti,ab.

#### **Ovid**

((("metabolism" OR "biological marker") AND "glioblastoma" AND ("artificial intelligence" OR "machine learning" OR "deep learning" OR "predictive model"))).ti,ab.

#### **Cochrane**

("glioblastoma"):ti,ab AND ("machine learning" OR "deep learning" OR "artificial intelligence" OR "predictive model"):ti,ab AND ("metabolism" OR "biomarkers"):ti,ab

**Table S1:** Risk of Bias Assessment

| STUDY             | TYPE       | LEVEL<br>OF<br>EVIDENCE | RISK OF BIAS             |               |                       |                       |          | PATIENT<br>SELECT<br>ION | APPLICABILITY<br>CONCERNS |                       |                       |
|-------------------|------------|-------------------------|--------------------------|---------------|-----------------------|-----------------------|----------|--------------------------|---------------------------|-----------------------|-----------------------|
|                   |            |                         | PATIENT<br>SELECT<br>ION | INDEX<br>TEST | REFERENCE<br>STANDARD | FLOW<br>AND<br>TIMING | ANALYSIS |                          | INDEX<br>TEST             | REFERENCE<br>STANDARD | FLOW<br>AND<br>TIMING |
| Ishwar (2022)     | Diagnostic | II                      | UNSURE                   | UNSURE        | LOW                   | UNSURE                |          | UNSURE                   | LOW                       | LOW                   |                       |
| McInerney (2022)  | Both       | II                      | HIGH                     | LOW           | HIGH                  | LOW                   | LOW      | LOW                      | LOW                       | LOW                   | LOW                   |
| Firdous (2021)    | Diagnostic | I                       | HIGH                     | LOW           | UNSURE                | UNSURE                |          | LOW                      | LOW                       | LOW                   |                       |
| Jia (2021)        | Prognostic | II                      | HIGH                     | UNSURE        | UNSURE                | LOW                   | UNSURE   | LOW                      | LOW                       | LOW                   | LOW                   |
| Kaluzinska (2021) | Prognostic | II                      | UNSURE                   | UNSURE        | UNSURE                | HIGH                  | UNSURE   | LOW                      | LOW                       | LOW                   | LOW                   |
| He (2020)         | Prognostic | II                      | HIGH                     | UNSURE        | UNSURE                | UNSURE                | UNSURE   | LOW                      | LOW                       | UNSURE                | UNSURE                |
| Zeng (2019)       | Prognostic | II                      | UNSURE                   | LOW           | HIGH                  | UNSURE                | UNSURE   | LOW                      | LOW                       | LOW                   | UNSURE                |
| Hao (2018)        | Prognostic | II                      | HIGH                     | HIGH          | HIGH                  | UNSURE                | HIGH     | LOW                      | LOW                       | LOW                   | HIGH                  |
| Shu (2018)        | Prognostic | II                      | HIGH                     | UNSURE        | UNSURE                | HIGH                  | HIGH     | LOW                      | LOW                       | UNSURE                | UNSURE                |
| Gollapalli (2012) | Diagnostic | II                      | HIGH                     | HIGH          | UNSURE                | UNSURE                |          | LOW                      | UNSURE                    | LOW                   |                       |

Risk of bias assessment based on Quality Assessment of Diagnostic Accuracy Studies 2 (QUADAS-2) for diagnostic studies and the Quality Assessment of Prognostic Accuracy Studies (QUAPAS) for prognostic studies.
